# Supplementary material for: Engineering transmembrane signal transduction in synthetic membranes using two-component systems
Source: PubMed Central journal article supplement — Proc Natl Acad Sci U S A. 2023 May 1;120(19):e2218610120. doi: 10.1073/pnas.2218610120 (PMC10175788; doi:10.1073/pnas.2218610120), 2023-05-01
Supplement: pnas.2218610120.sapp.pdf [file pnas.2218610120.sapp.pdf]

**Supporting Information for**

Engineering transmembrane signal transduction in synthetic membranes using two-component systems

Justin A. Peruzzi<sup>1, 2</sup>, Nina R. Galvez<sup>2, 3</sup>, Neha P. Kamat<sup>2, 3, 4</sup>

\*corresponding author: Neha P. Kamat

Email: [nkamat@northwestern.edu](mailto:nkamat@northwestern.edu)

Paste the full author list here

**This PDF file includes:**

Supporting text  
Figures S1 to S13  
Tables S1 to S5  
SI References

## Supplementary Figures

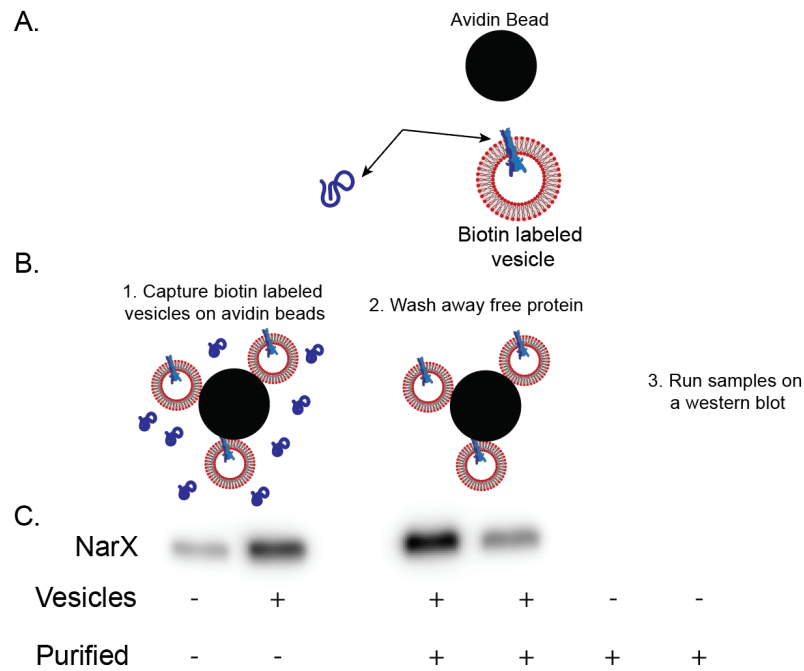

**Figure S1.** NarX associates with synthetic membranes. (A) NarX was expressed with and without DMPC vesicles labeled with biotin. (B) Vesicles were then pulled down with avidin coated magnetic beads and subsequently washed to remove non-vesicle associated protein. A western blot was then performed on the purified samples, probing for myc-tagged NarX. (C) NarX associates with DMPC vesicles as determined by Western Blot. NarX was expressed as determined by probing samples prior to purification. However, NarX was only retained only in samples with vesicles present in the reaction following purification.

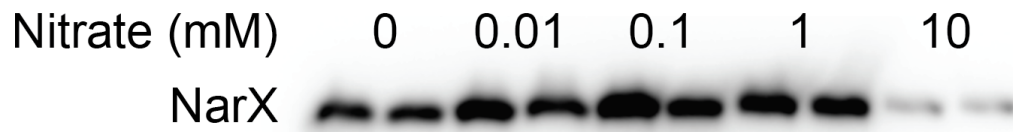

**Figure S2.** Protein expression is inhibited at high nitrate concentrations. Cell-free reactions were performed with increasing amounts of nitrate and expression of NarX was probed via western blot. At high concentrations of nitrate band intensity decreased, suggesting that nitrate inhibits protein expression. Each lane pair represents a replicate ( $n=2$ ).

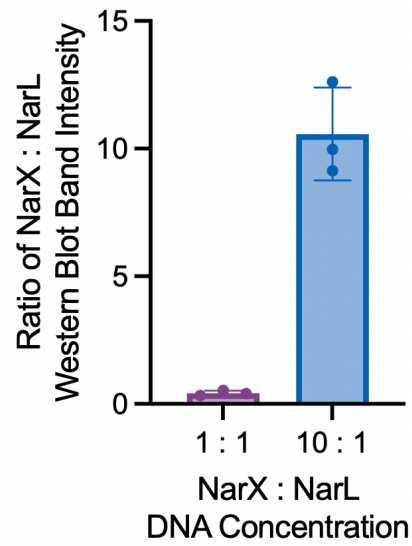

**Figure S3.** Protein expression can be tuned by altering DNA concentrations in cell-free reactions. Cell-free reactions containing 1 NarX : 1 NarL and 10 NarX : 1 NarL mol DNA (6.6 nM total) were run and protein expression was quantified by western blot. The ratio of band intensities of NarX to NarL increases with increasing ratio of the respective DNA concentrations.

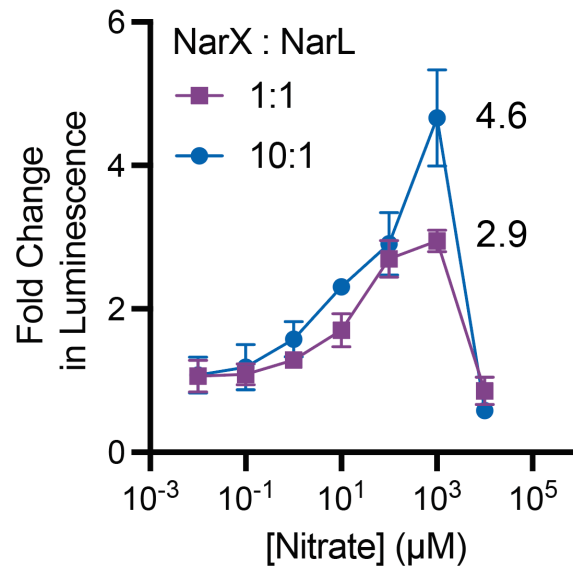

**Figure S4.** Nitrate titration for cell-free reactions with DMPC vesicles and either 1:1 or 10:1 NarX:NarL plasmid ratio. By altering the DNA ratio of NarX and NarL, the fold increase in luminescence in response to nitrate is increased. The sum of NarX and NarL plasmid concentrations were kept at 6.6 nM. All error bars represent the S. E. M. for  $n=3$  independent replicates.

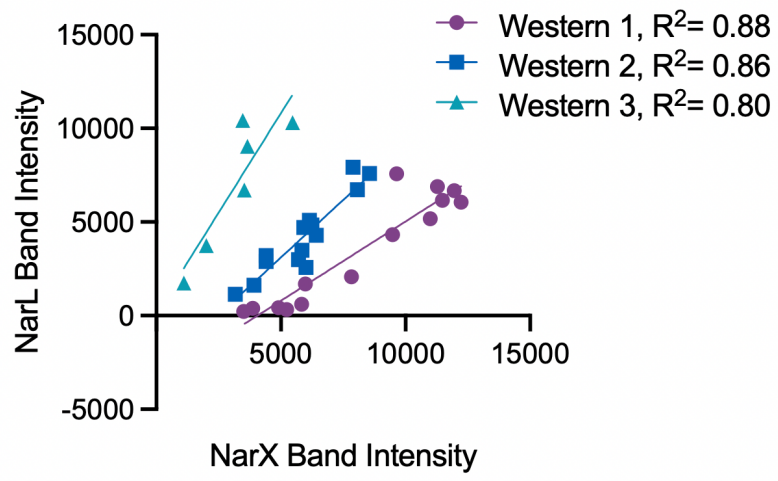

**Figure S5.** NarL band intensity correlates with NarX band intensity. Protein expression of each component is interrelated, as unfolded or aggregated protein likely aggregates nascent and expressed proteins. Each line represents a different western blot.

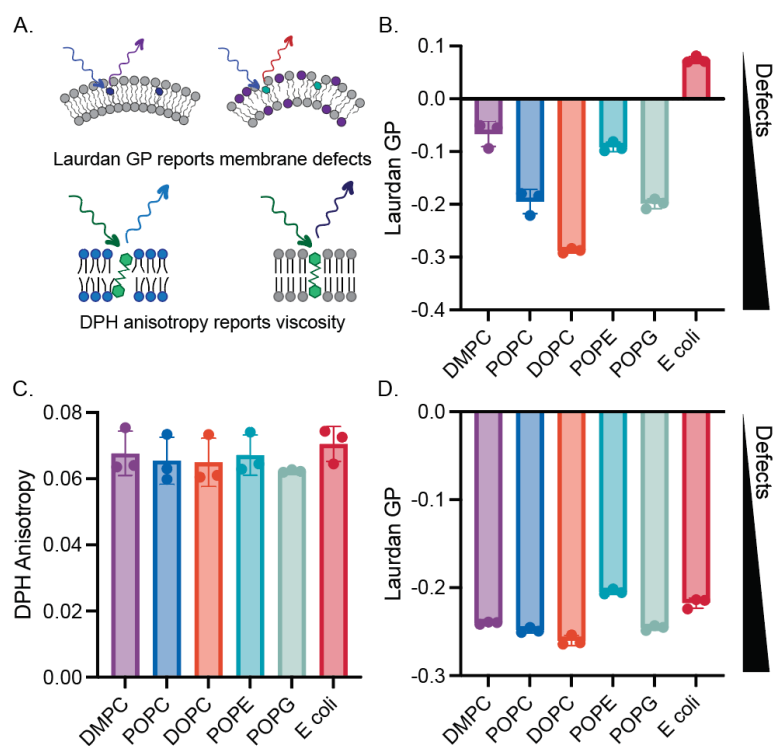

**Figure S6.** Measurement of membrane defects and viscosity for membranes used in this study. (A) Laurdan GP was used to measure membrane defects, while DPH anisotropy was used to measure membrane viscosity. (B) Laurdan GP measurements of membranes in Figure 2. (C) DPH Anisotropy and (D) Laurdan GP for membranes in Figures 3. Differences in DPH Anisotropy were not observed as POPC made up of 90 mol% in each sample, while only 10 mol% was altered. All error bars represent the S. E. M. for  $n=3$  independent replicates.

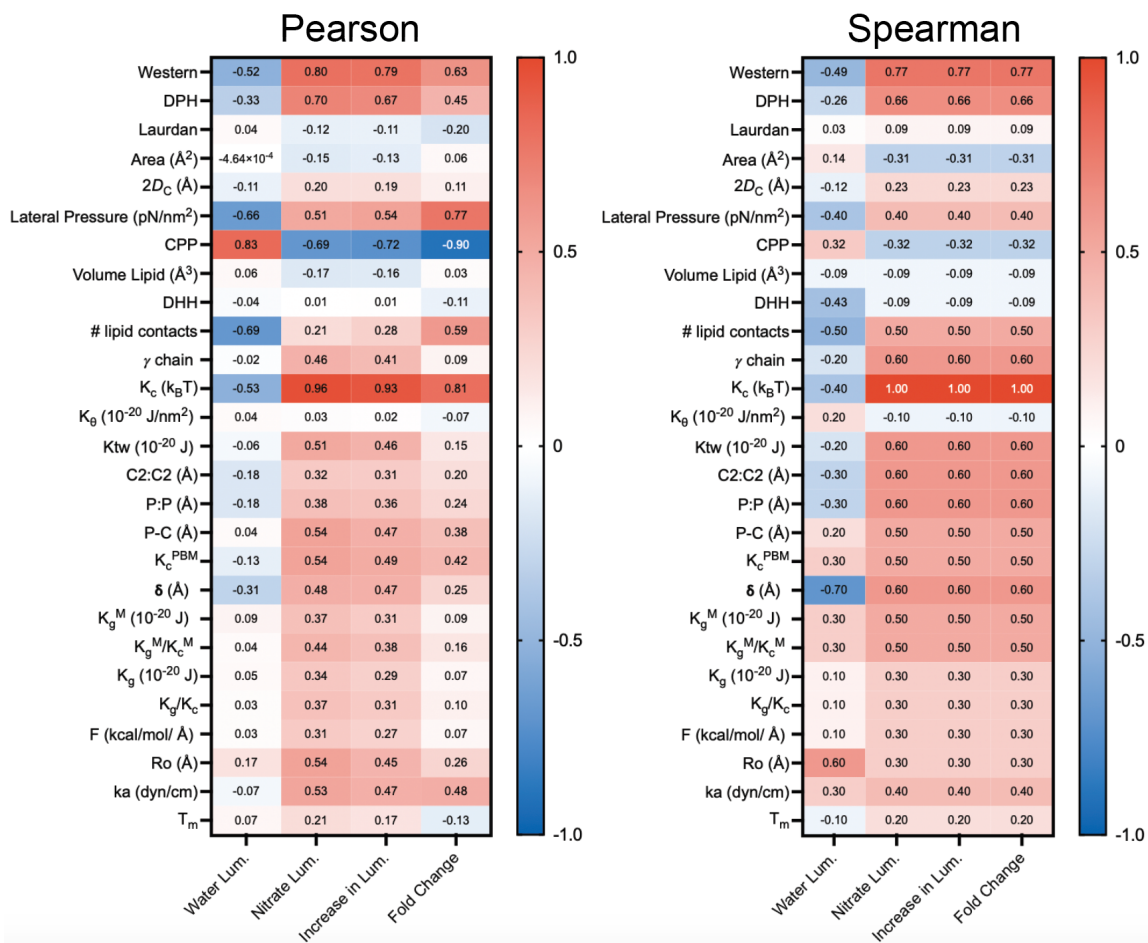

Figure S7. Pearson and Spearman correlations for data in Figure 2.



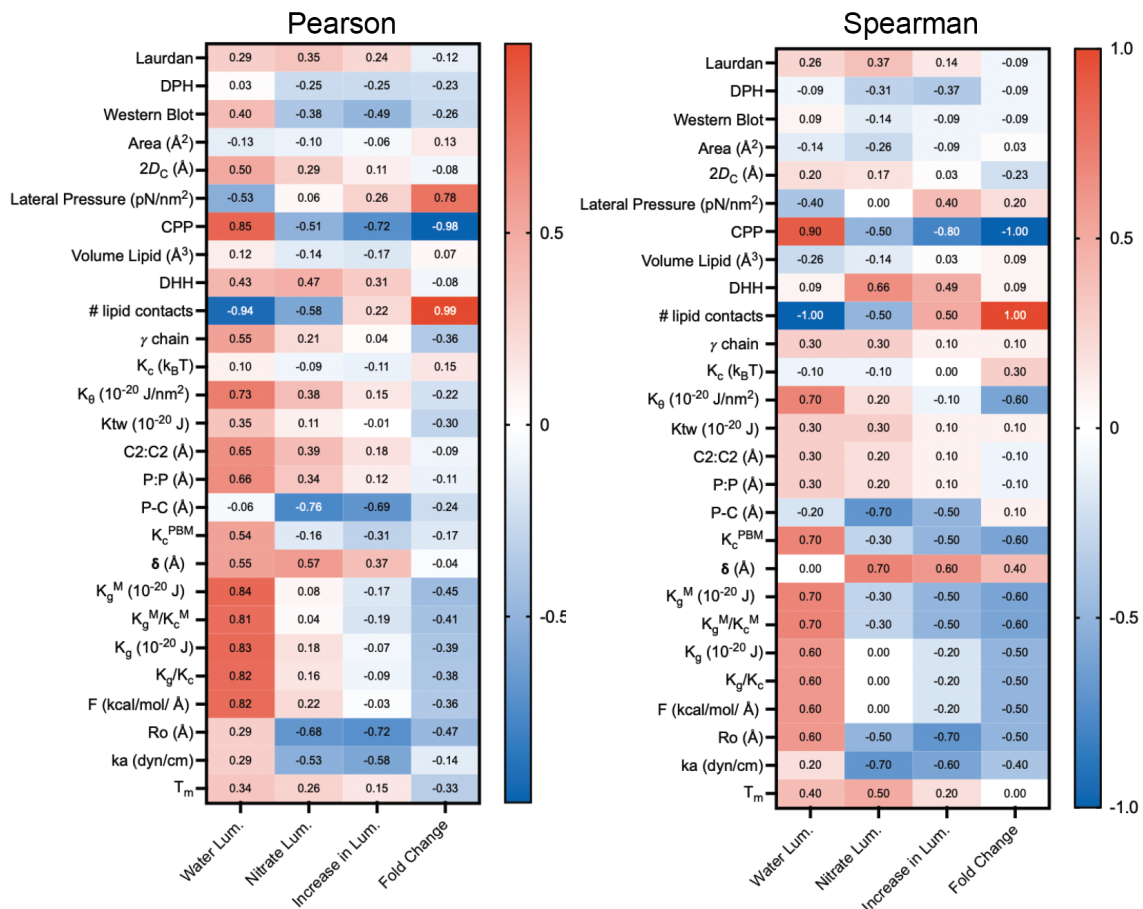

**Figure S8.** Pearson and Spearman correlations for data in Figure 3.

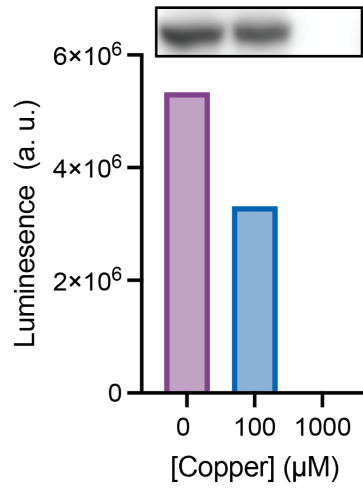

**Figure S9.** Copper inhibits cell-free protein synthesis at relevant concentrations. Protein expression as determined by NarX Western Blot band intensity and luminescence decreased with increasing copper concentration.

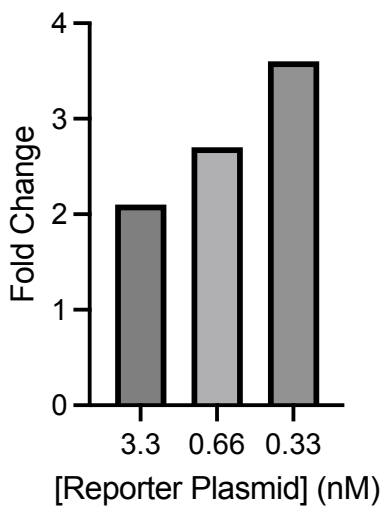

**Figure S10.** Tuning the concentration of reporter plasmid enhances chimera sensor fold change. Cell-free reactions were assembled with POPC liposomes and the NrsS chimeric protein, varying the concentration of the reporter plasmid from 3.3 to 0.33 nM. Fold change of luciferase expression in the presence and absence of nickel was calculated. As the concentration of reporter plasmid was decreased, the fold change in response to nickel increased ( $n=1$ ).

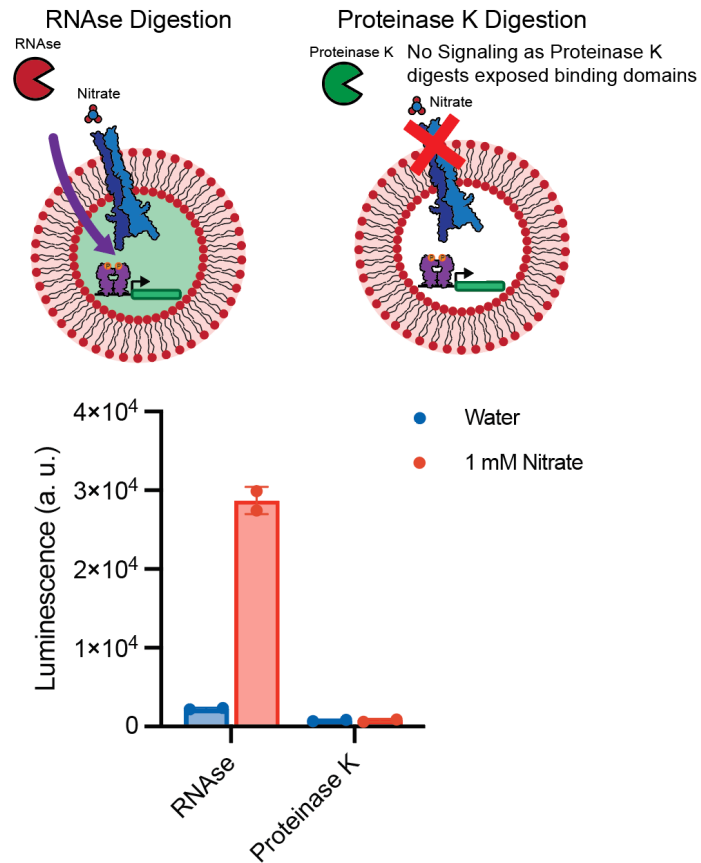

**Figure S11.** Encapsulated TCS signaling is inhibited upon incubation of Proteinase K but not RNase. External Proteinase K likely digests externally displayed nitrate binding domains, inhibiting downstream, nitrate dependent signaling.  $n=2$ , error bars represent S. E. M.

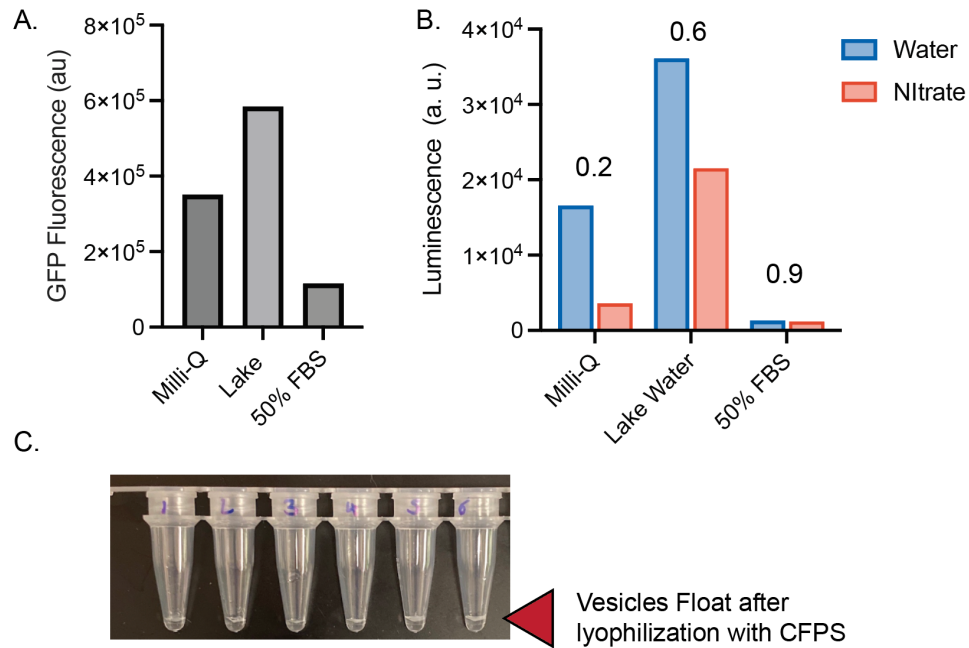

**Figure S12.** Characterizing the performance of lyophilized NarX-L sensors. (A) Background subtracted eGFP fluorescence following lyophilization and rehydration with different media. (B) Lyophilized NarX-L activity when vesicles are lyophilized with cell-free components. (C) Vesicles appear to float when lyophilized with cell-free reactions, likely leading to poor fold increase in response to nitrate. Experiments were repeated with vesicles in reactions prior to lyophilization multiple times and always produced fold increases opposite to what was observed in non-lyophilized experiments; representative data is shown ( $n=1$ ).

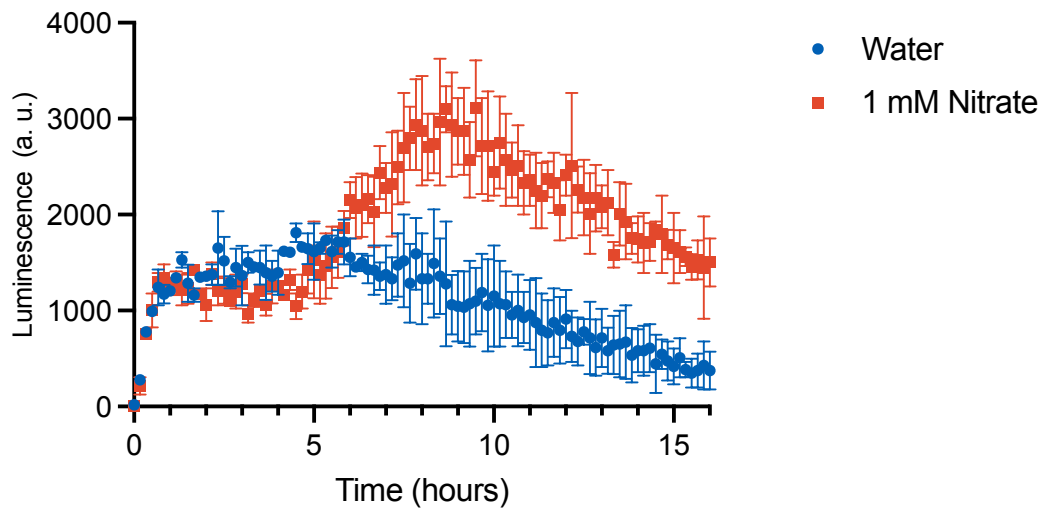

**Figure S13.** Kinetics of the NarX sensor. Cell-free reactions were set up and luminescence was read on the plate reader over time. The nitrate sample was significantly higher than the water sample after 6.5 hours ( $p < 0.03$ ). Luminescence decreases over time likely due to the reduction in substrate as it is used. Error bars represent the standard deviation,  $n=2$ .

**Table S1.** Dynamic light scattering of vesicles compositions used in Figure 2. Presented is an average and standard deviation of 2 independently prepared samples.

|                                         | <b><i>Diameter (nm)</i></b> | <b><i>SD (nm)</i></b> | <b><i>P.D.I.</i></b> |
|-----------------------------------------|-----------------------------|-----------------------|----------------------|
| <i>100% DMPC</i>                        | 127.44                      | 43.22                 | 0.115                |
| <i>100% POPC</i>                        | 128.14                      | 66.41                 | 0.269                |
| <i>100% DOPC</i>                        | 124.71                      | 62.77                 | 0.253                |
| <i>30% POPE, 70% POPC</i>               | 118.24                      | 47.02                 | 0.158                |
| <i>30% POPG, 70% POPC</i>               | 112.91                      | 61.28                 | 0.295                |
| <i>100% E. coli Polar Lipid Extract</i> | 127.19                      | 50.47                 | 0.157                |

**Table S2.** Lipid physical properties found in literature.

|                                                               | <b>POPC</b> | <b>DOPC</b> | <b>DMPC</b> | <b>POPE</b> | <b>POPG</b> | <b>E. coli</b> |
|---------------------------------------------------------------|-------------|-------------|-------------|-------------|-------------|----------------|
| <i>Area</i> ( $\text{\AA}^2$ ) (1)                            | 64.3        | 67.4        | 60.6        | 56.6        | 66          | 56.8           |
| $2D_c$ ( $\text{\AA}$ ) (2)                                   | 28.8        | 28.8        | 25.4        | 32.6        | 27.9        | 30             |
| <i>Lateral Pressure</i><br>( $\rho\text{N}/\text{nm}^2$ ) (3) | 517         | 480         | 442         | 456         |             |                |
| <i>CPP</i> (4)                                                | 0.61        | 1.09        | 1           | 1.08        | 0.7         |                |
| <i>Lipid Volume</i> ( $\text{\AA}^3$ ) (3)                    | 1231.2      | 1304.5      | 1100        | 1176.8      | 1226.6      | 1186.6(I)      |
| $D_{HH}$ ( $\text{\AA}$ ) (2)                                 | 37          | 36.7        | 35.3        | 43.4        | 38.5        | 40.8(I)        |
| <i># of lipid contacts</i> (5)                                | 2.75        |             |             | 1.5         |             | 2.25           |
| $\gamma$ chain (6)                                            | 0.198       | 0.18(5).221 | 0.247       | 0.188       |             |                |
| $K_c$ ( $k_B T$ ) (6)                                         | 31.7        | 28.8        | 29.3        | 31.2        | 26.9        |                |
| $K_\theta$ ( $10^{-20}$ J/ $\text{nm}^2$ ) (6)                | 5.52        | 6.4         | 4.02        | 8.04        | 6.15        |                |
| $K_{tw}$ ( $10^{-20}$ J) (6)                                  | 1.45        | 0.99        | 2.18        | 2.36        | 1.05        |                |
| <i>C2:C2</i> ( $\text{\AA}$ ) (6)                             | 27.52       | 27.37       | 24.54       | 30.67       | 26.88       |                |
| <i>P:P</i> ( $\text{\AA}$ ) (6)                               | 38.54       | 38.35       | 35.65       | 41.55       | 37.49       |                |
| <i>P-C</i> ( $\text{\AA}$ )                                   | 11.02       | 10.98       | 11.11       | 10.88       | 10.61       |                |
| <i>Head group thickness</i><br>(6)                            |             |             |             |             |             |                |
| $K_c^{PBM}$ (6)                                               | 9.5         | 9.71        | 5.75        | 10.78       | 5.67        |                |
| $\delta$ ( $\text{\AA}$ ) (6)                                 | 9.64        | 9.41        | 9.48        | 10.12       | 9.57        |                |
| $K_g^M$ ( $10^{-20}$ J) (6)                                   | -1.09       | -0.84       | -1.32       | 0.06        | -1.43       |                |
| $K_g^M/K_c^M$ (6)                                             | -0.17       | -0.14       | -0.22       | 0.01        | -0.25       |                |
| $K_g$ ( $10^{-20}$ J) (6)                                     | -1.38       | -0.08       | -3.23       | 5.85        | -2.76       |                |
| $K_g/K_c$ (6)                                                 | -0.1        | -0.01       | -0.26       | 0.44        | -0.24       |                |
| $F$ ( $\text{kcal}/\text{mol}/\text{\AA}$ ) (6)               | 0.0303      | 0.061       | -0.0225     | 0.2041      | 0.0036      |                |
| $R_o$ ( $\text{\AA}$ ) (6)                                    | -315        | -1(5)392    | -47         | -2220       |             |                |
| $K_a$ ( $\text{dyn}/\text{cm}$ ) (6)                          | 280         | 290         | 210         | 260         | 180         |                |
| $T_m$ (7)                                                     | -9          | -17         | 24          | 25          | -2          |                |



**Table S3.** Dynamic light scattering of vesicle compositions used in Figure 3. All vesicles are composed of 90% POPC and 10% of lipid listed in the table. Presented is an average and standard deviation of 2 independently prepared samples.

|                | <i>Diameter (nm)</i> | <i>SD (nm)</i> | <i>P.D.I.</i> |
|----------------|----------------------|----------------|---------------|
| <i>DMPC</i>    | 129.61               | 60.54          | 0.218         |
| <i>POPC</i>    | 128.14               | 66.41          | 0.269         |
| <i>DOPC</i>    | 129.86               | 72.76          | 0.271         |
| <i>POPE</i>    | 125.23               | 61.91          | 0.244         |
| <i>POPG</i>    | 121.16               | 51.83          | 0.183         |
| <i>E. coli</i> | 128.33               | 47.69          | 0.209         |

**Table S4.** Dynamic light scattering of 100% POPC vesicles in the presence of ligands used in this study. Presented is an average and standard deviation of 2 independently prepared samples.

|                        | <i>Diameter (nm)</i> | <i>SD (nm)</i> | <i>P.D.I.</i> |
|------------------------|----------------------|----------------|---------------|
| <i>1 mM Nitrate</i>    | 123.26               | 64.93          | 0.278         |
| <i>1 mM Nickel</i>     | 123.27               | 54.07          | 0.192         |
| <i>100 μM Iron</i>     | 118.62               | 43.63          | 0.135         |
| <i>1 mM Vancomycin</i> | 124.88               | 54.32          | 0.189         |

**Table S5.** DNA sequences used in this study. All genes were placed under the control of a T7 promoter, except nanoluciferase and GFP. These constructs were under the control of the PydfJ115 promoter. The promoter sequence is listed in with the gene.

| Plasmid/Gene | Sequence                                                                                                                                                                                                                                                                                                                                                                                                                                                                                                                                                                                                                                                                                                                                                                                                                                                                                                                                                                                                                                                                                                                                                                                                                                                                                                                                                                                                                                                                                                                                                                                                                                                                                                                                                                                                                                                                                                                                                                                                                                                       |
|--------------|----------------------------------------------------------------------------------------------------------------------------------------------------------------------------------------------------------------------------------------------------------------------------------------------------------------------------------------------------------------------------------------------------------------------------------------------------------------------------------------------------------------------------------------------------------------------------------------------------------------------------------------------------------------------------------------------------------------------------------------------------------------------------------------------------------------------------------------------------------------------------------------------------------------------------------------------------------------------------------------------------------------------------------------------------------------------------------------------------------------------------------------------------------------------------------------------------------------------------------------------------------------------------------------------------------------------------------------------------------------------------------------------------------------------------------------------------------------------------------------------------------------------------------------------------------------------------------------------------------------------------------------------------------------------------------------------------------------------------------------------------------------------------------------------------------------------------------------------------------------------------------------------------------------------------------------------------------------------------------------------------------------------------------------------------------------|
| NarX         | ATGCTTAAACGTTGTCTCTCTCCGCTCACCCCTGGTTAATCAGGTTG<br>CGCTTATTGTGTTGCTTTCTACTGCTATTGGACTGGCAGGGATGGC<br>GGTTTCTGGCTGGCTGGTGCAAGGCGTTCAGGGCAGCGCCCATGC<br>GATCAACAAAGCGGGATCGCTGCGCATGCAAAGTTACCGTCTGTTG<br>GCGGCAGTGCCATTAAGCGAGAAAGACAAGCCCTTAATTAAGAGA<br>TGGAACAAACGGCATTAGCGCCGAGTTGACTCGAGCAGCAGAAC<br>GAGACGGACAACGGCGCAATTACAGGGTTTACAAGTACTGGC<br>GTAATGAACTGATCCCTGCGCTGATGCGTGCACAAAACCGAGAAAC<br>GGTGTCAGCGGATGTCAGCCAGTTTGTGCGGGCTTGATCAACT<br>GGTATCTGGTTTTGACCGCACCCAGGAAATGCGCATCGAGACAGT<br>GGTACTGGTCCATCGGGTAATGGCGGTATTTATGCCATTTTACTG<br>GTGTTCACTATTATCTGGTTGCGGGCGCGACTGTACAACCGTGGC<br>GGCAACTGCTGGCAATGGCGAGTGCCGTCAGTCATCGGATTTTA<br>CCCAACGCGCAAACATCAGCGGGCGCAACGAAATGGCGATGCTTG<br>GAACTGCGTTGAACAATATGTCTGCAGAACTGGCCGAAAGTTATGC<br>CGTACTTGAGCAGCGGGTTCAGGAGAAAACCGCCGGGCTGGAGCA<br>TAAAATCAGATCCTCTCTTTTTTATGGCAGGCTAACCGCCGTTTGC<br>ATTCCCGCGCCCCGCTGTGTGAACGCCTGTCACCTGACTCAACG<br>GCTTACAGAATTTAACCCCTGCTACGTGATATCGAATTGCGGGTGT<br>TGACACTGATGATGAAGAGAATCATCAGGAGTTTACCTGCCAGCCA<br>GATATGACTTGTGATGATAAAGGCTGCCAGCTCTGCCCGCGCGGC<br>GTATTACCCGTTGGTATCGCGGCACGACCCTGAAGTGGCGGCTG<br>GCTGACTCTCATACGCAGTACGGTATTTTGTGGCGACCCTGCCAC<br>AGGGGCGTCATCTTAGCCATGATCAACAACAACCTGGTGGATACCCT<br>GGCTGAACAACCTACCGCCACGCTGGCGCTGGATCGCCATCAGGA<br>ACGTCAGCAACAGTTGATCGTGATGGAAGAGCGTGCCACCATTGC<br>GCGCGAACTGCATGATTCTATTGCCCAATCTCTCTCTTGCATGAAG<br>ATGCAGGTGAGTTGTTTACAGATGCAGGGCGATGCGCTGCCAGAA<br>AGCAGCCGCGAACTGTTAAGTCAGATCCGTAACGAACTGAATGCAT<br>CCTGGGCGCAGTTGCGTGAATTGCTCATCACATTCCGCTTGCACT<br>CACCGAGCCTGGATTACGTCCGGCGCTGGAGGCGAGTTGCGAAGA<br>GTACAGCGCCAAATTTGGCTTCCCGGTGAAGCTGGATTATCAATTG<br>CCGCCTCGCCTGGTGCCTTCGCATCAGGCAATCCACTTGTGCAA<br>TTGCCCGTGAGGCATTAAGTAACGCCCTCAAACATTCGCAAGCGAG<br>TGAAGTCGTGGTGACGGTGGCGCAAAACGATAATCAGGTCAAAT<br>GACCGTCCAGGATAACGGCTGCGGCGTGCCTGAAAATGCCATCCG<br>CAGCAATCACTACGGCATGATAATAATGCGCGATCGTGCGCAAAGT<br>TTACGAGGCGATTGCCGCGTCCGCCGTCGTGAATCAGGTGGCACC<br>GAAGTGGTGGTCACCTTTATTCCCGAAAAAACTTTTACAGACGTCC<br>AAGGAGATACCCATGAGGGAGGAGGAAGCGAGCAGAACTCATCT<br>CTGAAGAGGATCTGTAA |
| NarL         | ATGAGTAATCAGGAACCGGCTACTATCCTGCTGATTGACGATCACC<br>CGATGCTGCGAACTGGCGTAAAACAGCTTATCAGTATGGCACCAGA<br>TATCACCGTGGTTGGCGAAGCGAGTAATGGCGAACAGGGTATTGA<br>ACTGGCGGAGTCTCTTGATCCCGATCTGATCCTGTTAGATCTCAAT<br>ATGCCCGGCATGAACGGTCTGGAAACGCTGGATAAACTGCGCGAA<br>AAGTCCCTCTCAGGGCGCATTGTGGTATTCAGCGTCTCTAACCATG<br>AAGAAGATGTGGTCACCGCACTGAAACGCGGCGCGGATGGCTATC<br>TGTTAAAAGATATGGAACCGGAAGATCTGCTGAAAGCATTGCATCA<br>GGCAGCTGCTGGCGAAATGGTATTAAGCCCTGATATCCTTAAACGT<br>CTGCAAGAAATCCAATTTGAGCGGATGAAAAGCAGCGCAATGAGA                                                                                                                                                                                                                                                                                                                                                                                                                                                                                                                                                                                                                                                                                                                                                                                                                                                                                                                                                                                                                                                                                                                                                                                                                                                                                                                                                                                                                                                                                                                                                   |

|                      |                                                                                                                                                                                                                                                                                                                                                                                                                                                                                                                                                                                                                                                                                                                                                                                                                                                                                                                                                                                                      |
|----------------------|------------------------------------------------------------------------------------------------------------------------------------------------------------------------------------------------------------------------------------------------------------------------------------------------------------------------------------------------------------------------------------------------------------------------------------------------------------------------------------------------------------------------------------------------------------------------------------------------------------------------------------------------------------------------------------------------------------------------------------------------------------------------------------------------------------------------------------------------------------------------------------------------------------------------------------------------------------------------------------------------------|
|                      | CGCAGCTGACAGAAAAGGAAGTCATTGTTCTAAAAGCAATTGCTAA<br>AGGTCTTAAAAGCAAAGCGATTGCCTTTGATTTGGGCGTCTCTGAG<br>CGAACAGTAAAGTCCAGATTAACGTCCATTTACAATAAATTAGGCGC<br>GAATCAAGAACTGAGGCAGTAACGATTGCCATGCAAAAAGGTATT<br>CTGACAATAGACAACggAGGAGGAAGCGATTACAAGGATGACGACG<br>ATAAGTAA                                                                                                                                                                                                                                                                                                                                                                                                                                                                                                                                                                                                                                                                                                                                   |
| PYdfJ115_nanoluc     | ACTGCATATTTGAAAATTGCCCAAACGTACATGCCCGAATGTACGTT<br>TTTTTCATTTCAATTGTCAACTACAATGAGAAAGAATGTGATCAAGCA<br>ATGTGTTGAAAGGAGATTATCACGTGCGACTCTCGAGTGAGATTGTT<br>GACGGTACCGTATTTTGGATCTAGGAGGAAGGATCTATGGTGTTTA<br>CGCTGGAGGATTTTCGTGCGTACTGGCGTCAGACAGCTGGGTATA<br>ACCTTGACCAGGTAATTGAACAAGGCGGCGTTTCCAGCTTATTTCA<br>AAATCTGGGGGTGTCTGTCACACCAATTCAGCGCATTGTCTTGCT<br>GGGGAGAATGGTCTTAAAATTGATATTCATGTTATCATCCCTTACGA<br>AGGTTTGTCCGGTGACCAAATGGGACAAATCGAGAAAATTTTCAA<br>GTGGTTTATCCAGTGGATGATCATCACTTTAAAGTCATTTTACACTA<br>TGGTACGCTGGTAATCGACGGTGTGACACCGAACATGATTGATTAT<br>TTCGGGCGTCCGTATGAAGGAATCGCCGTTTTTGTGAGGAAAGAAA<br>TCACCGTAACAGGTAATCTGTGGAACGGAACAAAATCATCGACGA<br>ACGCTTGATTAACCCCGATGGTAGTTTGTGTTCCGTGTTACGATTA<br>ACGGAGTTACGGGTTGGCGCCTTTGTGAGCGTATCTTGGCCGGA<br>GCGGAAGCGAGCAGAAACTCATCTCTGAAGAGGATCTGTAA                                                                                                                                                                              |
| PYdfJ115_GFP         | ACTGCATATTTGAAAATTGCCCAAACGTACATGCCCGAATGTACGTT<br>TTTTTCATTTCAATTGTCAACTACAATGAGAAAGAATGTGATCAAGCA<br>ATGTGTTGAAAGGAGATTATCACGTGCGACTCTCGAGTGAGATTGTT<br>GACGGTACCGTATTTTGGATCTAGGAGGAAGGATCTATGAGCAAAG<br>GAGAAGAACTTTTCACTGGAGTTGTCCCAATTCTTGTGTAATTAGAT<br>GGTGATGTTAATGGGCACAAAATTTCTGTCCGTGGAGAGGGTGAAG<br>GTGATGCTACAAACGGAAAACCTACCCTTAAATTTATTTGCACTACT<br>GGAAAACCTGTTCCGTGGCCAACACTTGTCACTACTCTGACCT<br>ATGGTGTTCAATGCTTTTCCCGTTATCCGGATCACATGAAACGGCA<br>TGACTTTTTCAAGAGTGCCATGCCCGAAGGTTATGTACAGGAACGC<br>ACTATATCTTTCAAAGATGACGGGACCTACAAGACGCGTGCTGAAG<br>TCAAGTTTGAAGGTGATACCCTTGTTAATCGTATCGAGTTAAAGGGT<br>ATTGATTTTAAAGAAGATGGAAACATTCTTGGACACAAACTCGAGTA<br>CAACTTTAACTCACACAATGTATACATCACGGCAGACAAACAAAAGA<br>ATGGAATCAAAGCTAACTTCAAAATTCGCCACAACGTTGAAGATGG<br>TTCCGTTCACTAGCAGACCATTATCAACAAAATACTCCAATTGGCG<br>ATGGCCCTGTCTTTTACCAGACAACCATTACCTGTGACACAATCT<br>GTCCTTTGAAAGATCCCAACGAAAAGCGTGACCACATGGTCCTTC<br>TTGAGTTTGTAACTGCTGCTGGGATTACACATGGCATGGATGAGCT<br>CTACAAATAA |
| NarX-CusS<br>Chimera | ATGGTGAGCAAACCGTTTTCAGCGTCCGTTTAGCCTGGCAACCCGTC<br>TGACCTTTTTTCAATTTCACTGGCAACCATTGCAGCATTTTTTCGCAATTT<br>GCATGGATTATGATCCATAGCGTGAAAGTGCATTTTCCGAACAGG<br>ATATTAACGACCTGAAAGAAATTAGCGCAACCCTGGAACGTGTTCT<br>GAATCATCCTGATGAAACCCAGGCACGTCGTCTGATGACCCTGGAA<br>GATATTGTTAGCGGTTATAGCAATGTTCTGATTAGTCTGGCAGATAG<br>CCAGGGTAAAACCGTTTATCATAGTCCGGGTGCACCGGATATTCGT<br>GAATTTACCGTGATGCAATTCGGGATAAAGATGCACAAGGTGGTG<br>AAGTTTATCTGCTGAGCGGTCCGACCATGATGATGCCTGGTCATGG<br>TCATGGCCACATGGAACATAGCAATTGGCGTATGATTAATCTGCCG<br>GTTGGTCCGCTGGTTGATGGTAAACCGATTTATACCCTGTATATTG<br>CCCTGAGCATTGATTTTTCATCTGCACTATATCAACGATCTGATGAAC<br>AAACTGATTATGACCGCAAGCGTTATTAGCATCCTGATTGTTTTTAT<br>TGTTCTGCTGGCAGTTCATAAAGGTCATGCACCGATTTCGTAGCGTT                                                                                                                                                                                                                                                                    |

|                               |                                                                                                                                                                                                                                                                                                                                                                                                                                                                                                                                                                                                                                                                                                                                                                                                                                                                                                                                                                                                                                                                                                                                                                                                                                                                                                                                                                                                                                                                                                                    |
|-------------------------------|--------------------------------------------------------------------------------------------------------------------------------------------------------------------------------------------------------------------------------------------------------------------------------------------------------------------------------------------------------------------------------------------------------------------------------------------------------------------------------------------------------------------------------------------------------------------------------------------------------------------------------------------------------------------------------------------------------------------------------------------------------------------------------------------------------------------------------------------------------------------------------------------------------------------------------------------------------------------------------------------------------------------------------------------------------------------------------------------------------------------------------------------------------------------------------------------------------------------------------------------------------------------------------------------------------------------------------------------------------------------------------------------------------------------------------------------------------------------------------------------------------------------|
|                               | <p>AGCCGTCAGATTCAGAATATTACCAGCAAAGATCTGGATGTTCTGCT<br/> TGGATCCGCAGACCGTTCCGATTGAACTGGAACAGCTGGTTCTGA<br/> GCTTTAATCATATGAGCGCAGAACTGGCAGAAAGCTATGCAGTTCT<br/> GGAACAGCGTGTTCAAGAGAAAACCGCAGGCCTGGAACATAAAAAAT<br/> CAGATTCTGAGCTTTCTGTGGCAGGCAAATCGTCGTCTGCATAGCC<br/> GTGCACCGCTGTGTGAACGTCTGAGTCCGTTCTGAATGGTCTGC<br/> AGAACCTGACACTGCTGCGTGATATTGAACTGCGTGTTTATGATAC<br/> CGATGATGAAGAAAACCACCAAGAATTTACCTGTCAGCCGGATATG<br/> ACCTGTGATGATAAAGGTTGTCAGCTGTGTCCGCGTGGTGTCTGC<br/> CGGTGGGTGATCGTGGTACAACCCTGAAATGGCGTCTGGCCGATA<br/> GTCATACCCAGTATGGTATCCTGCTGGCGACACTGCCGCAGGGTC<br/> GTCATCTGAGCCATGATCAGCAGCAGCTGGTAGATACCCTGGCCG<br/> AACAGCTGACCGCAACACTGGCACTGGATCGTCATCAAGAACGTCA<br/> GCAGCAACTGATTGTTATGGAAGAACGTGCCACCATTGC CGGTGAA<br/> CTGCATGATAGCATTGCACAGAGCCTGAGCTGTATGAAAATGCAGG<br/> TTAGCTGTCTGCAGATGCAGGGTGATGCACCTGCCGAAAGCTCAC<br/> CGAACTGCTGAGCCAGATTGCAATGAACTGAATGCCAGCTGGG<br/> CACAGCTGCGTGAGCTGCTGATTACCTTTCTGCTGCAGCTGACAGA<br/> ACCGGGTCTGCGTCCGGCACTGGAAGCAAGCTGTGAAGAATATTC<br/> AGCGAAATTTGGTTTTCCGGTGAACCTGGATTATCAGCTGCCTCCG<br/> CGTCTGGTTCCGAGCCATCAGGCAATTCATCTGCTGCAAATTGCAC<br/> GTGAAGCACTGAGCAATGCACTGAAACATTCACAGGCAAGCGAAGT<br/> TGTTGTTACCGTTGCACAGAATGATAACCAGGTTAACTGACCGTT<br/> CAGGATAATGGTTGTGGTGTCCGGAAAATGCAATTCGTAGCAATC<br/> ATTATGGCATGATCATTATGCGTGATCGTGCCCAGAGCCTGCGTGG<br/> TGATTGTCGTGTTGTCGTGCTGAAAGCGGTGGTACAGAAGTGGT<br/> GGTTACCTTTATTCCTGAGAAAACCTTTACCGATGTTCCAGGGTGATA<br/> CCCATGAAGGTGGTGGTAGCGAACAGAACTGATTTGAGAAGAAGA<br/> TCTGTAA</p> |
| <p>NarX-NrsS<br/> Chimera</p> | <p>ATGAATACCCGTCGTCTGTTTGCACGTAGCCGTCTGCAGCTGGCAT<br/> TTTGGTATGCACTGGTTATGGGTGGTATTCTGACCCTGTTAGGTCT<br/> GGGTGTTTATCGTGCAATTGTTTCAGGCAAATTGGATGGCACTGGAA<br/> CGTGAAGTTGAAAGCATTGCAGGCACCCTGCATGATAGCCTGGAA<br/> CCGATGCTGCCGAGCAATGCAAGCCCGACCGGTGTGCTGCAGAAA<br/> ATGCTGCCGGATCTGTGTCTGGTTAATCAGCCGTGCCAGGTTAATC<br/> CGACACTGATTGAACGTATACCCTGGGTATTAGCGATCGTAGCCT<br/> GTATTATATCCGCCTGTTTGATTATCAGGGTAATCTGCTGGCGTTTA<br/> GCCCCAATCAGCCTGCAAGCCTGAGCAGCATCTTTAATCAAGAAAC<br/> CTGGCAGACCATTATCCGCCTACCGGTGATCGTTATCGTCAGTTT<br/> ACCACCATTCTGCATAGCGCAGGTAATACCGATAAAAAGCAGCTGGG<br/> GTTATCTGCAAATTGGTCTAGTCTGGCAGCCTTTGATGCCGAAAA<br/> TAAACGTATTCTGTGATTCTGGGTCTGAGCTTTCCGATTGCACTG<br/> GGTTTAGTTGCATTTAGCAGTTGGGGTTTAGCAGGTCTGGCAATGC<br/> GTCCGATTTATCAGAGCTATCAGCAGCAGCAACAGTTTACCGCAAAA<br/> TGCAGCACATGAACTGCGTAGTCCGCTGGCAAGCCTGCTGGCAAC<br/> CGTTGAAGCAGTTCTGCGTATTGATAGCAGCCATAGTCCGGAAATT<br/> AACACCATGTCTGCAGAACTGGCCGAAAGTTATGCCGTACTTGAGC<br/> AGCGGGTTCCAGGAGAAAACCGCCGGGCTGGAGCATAAAAATCAGA<br/> TCCTCTCTTTTTTATGGCAGGCTAACCGCCGTTTGCATTCCC CGC<br/> CCCCTGTGTGAACGCCTGTCACCTGACTCAACGGCTTACAGAAT<br/> TTAACCTGCTACGTGATATCGAATTGCGGGTGTATGACACTGATG<br/> ATGAAGAGAATCATCAGGAGTTTACCTGCCAGCCAGATATGACTTG<br/> TGATGATAAAGGCTGCCAGCTCTGCCCGCGCGGCGTATTACCCGT<br/> TGGTGATCGCGGCACGACCCTGAAGTGCGGGCTGGCTGACTCTCA<br/> TACGCAGTACGGTATTTGCTGGCGACCCTGCCACAGGGGCGTCA<br/> TCTTAGCCATGATCAACAACAACCTGGTGGATACCCTGGCTGAACAA</p>                                                               |

|                      |                                                                                                                                                                                                                                                                                                                                                                                                                                                                                                                                                                                                                                                                                                                                                                                                                                                                                                                                                                                                                                                                                                                                                                                                                                                                                                                                                                                                                                                                                                                                                                                                                                                                                                                                                                                                                                                            |
|----------------------|------------------------------------------------------------------------------------------------------------------------------------------------------------------------------------------------------------------------------------------------------------------------------------------------------------------------------------------------------------------------------------------------------------------------------------------------------------------------------------------------------------------------------------------------------------------------------------------------------------------------------------------------------------------------------------------------------------------------------------------------------------------------------------------------------------------------------------------------------------------------------------------------------------------------------------------------------------------------------------------------------------------------------------------------------------------------------------------------------------------------------------------------------------------------------------------------------------------------------------------------------------------------------------------------------------------------------------------------------------------------------------------------------------------------------------------------------------------------------------------------------------------------------------------------------------------------------------------------------------------------------------------------------------------------------------------------------------------------------------------------------------------------------------------------------------------------------------------------------------|
|                      | <p>CTCACCGCCACGCTGGCGCTGGATCGCCATCAGGAACGTCAGCAA<br/> CAGTTGATCGTGATGGAAGAGCGTGCCACCATTGCGCGCGAACTG<br/> CATGATTCTATTGCCAATCTCTCTCTTGCATGAAGATGCAGGTGA<br/> GTTGTTTACAGATGCAGGGCGATGCGCTGCCAGAAAGCAGCCGCG<br/> AACTGTTAAGTCAGATCCGTAACGAAGTGAATGCATCCTGGGCGCA<br/> GTTGCGTGAATTGCTCATCACATTCCGCTTGCAGCTCACCGAGCCT<br/> GGATTACGTCCGGCGCTGGAGGCGAGTTGCGAAGAGTACAGCGC<br/> CAAATTTGGCTTCCCGGTGAAGCTGGATTATCAATTGCCGCCTCGC<br/> CTGGTGCCTTCGCATCAGGCAATCCACTTGTGCAAATTGCCCGTG<br/> AGGCATTAAGTAACGCCCTCAAACATTCGCAAGCGAGTGAAGTCGT<br/> GGTGACGGTGGCGCAAACGATAATCAGGTCAAAGTACCAGTCCA<br/> GGATAACGGCTGCGGCGTGCCTGAAAATGCCATCCGCAGCAATCA<br/> CTACGGCATGATAAATGCGCGATCGTGCGCAAAGTTTACGAGGC<br/> GATTGCCGCGTCCGCGTTCGTGAATCAGGTGGCACCGAAGTGGT<br/> GTCACCTTTATTCCCGAAAAAATTTACAGACGTCCAAGGAGATA<br/> CCCATGAGGGAGGAGGAAGCGAGCAGAACTCATCTCTGAAGAGG<br/> ATCTGTAA</p>                                                                                                                                                                                                                                                                                                                                                                                                                                                                                                                                                                                                                                                                                                                                                                                                                                                                                                                                                                                              |
| NarX-VanS<br>Chimera | <p>ATGGTGATCAAGCTGAAGAACAAGAAAAACGACTACAGCAAAGTGG<br/> AACGCAAGCTGTATATGTATATTGTTGCCATTGTTGTGGTGGCCATT<br/> GTGTTTGTCTGTATATTCGTAGCATGATCCGTGGCAAATTAGGTGA<br/> TTGGATTCTGAGCATTCTGGAAAACAAATATGATCTGAATCACCTGG<br/> ATGCCATGAAACTGTATCAGTATAGCATTTCGCAACAACATCGACATC<br/> TTTATCTATGTGGCGATTGTGATTAGCATTCTGATTCTGTGTCGTGT<br/> GATGCTGAGTAAATTCGCCAAATATTTTCGATGAAATCAACACCGGC<br/> ATTGATGTGCTGATTGAGAATGAAGATAAGCAGATTGAACTGAGCG<br/> CAGAAATGGATGTTATGGAACAGAACTGAACACCATGTCTGCAGA<br/> ACTGGCCGAAAGTTATGCCGTAATGAGCAGCGGGTTCAGGAGAA<br/> AACCGCCGGGCTGGAGCATAAAAATCAGATCCTCTCTTTTTTATGG<br/> CAGGCTAACCGCCGTTTGCATTCCCGCGCCCCGCTGTGTGAACGC<br/> CTGTCACCTGTAACCGCTTACAGAATTTAACCTGCTACGTG<br/> ATATCGAATTGCGGGTGTATGACACTGATGATGAAGAGAATCATCA<br/> GGAGTTTACCTGCCAGCCAGATATGACTTGTGATGATAAAGGCTGC<br/> CAGCTCTGCCCGCGCGGCTATTACCCGTTGGTGATCGCGGCACG<br/> ACCCTGAAGTGGCGGCTGGCTGACTCTCATACGCAGTACGGTATTT<br/> TGCTGGCGACCCTGCCACAGGGGCGTCATCTTAGCCATGATCAAC<br/> AACAACTGGTGGATACCCTGGCTGAACAACCTACCGCCACGCTGG<br/> CGCTGGATCGCCATCAGGAACGTCAGCAACAGTTGATCGTGATGG<br/> AAGAGCGTGCCACCATTGCGCGCAACTGCATGATTCTATTGCCCA<br/> ATCTCTCTTGCATGAAGATGCAGGTGAGTTGTTTACAGATGCAG<br/> GGCGATGCGCTGCCAGAAAGCAGCCGCAACTGTTAAGTCAGATC<br/> CGTAACGAAGTGAATGCATCCTGGGCGCAGTTGCGTGAATTGCTCA<br/> TCACATTCCGCTTGCAGCTCACCGAGCCTGGATTACGTCCGGCGC<br/> TGGAGGCGAGTTGCGAAGAGTACAGCGCCAAATTTGGCTTCCCGG<br/> TGAAGCTGGATTATCAATTGCCGCCTCGCCTGGTGCCTTCGCATCA<br/> GGCAATCCACTTGTGCAAATTGCCCGTGAGGCATTAAGTAACGCC<br/> CTCAAACATTCGCAAGCGAGTGAAGTCGTGGTACGGTGGCGCAA<br/> AACGATAATCAGGTCAAAGTACCAGTCCAGGATAACGGCTGCGGC<br/> GTGCCTGAAAATGCCATCCGCAGCAATCACTACGGCATGATAATA<br/> TGCGCGATCGTGCGCAAAGTTTACGAGGCGATTGCCGCGTCCGCC<br/> GTCGTGAATCAGGTGGCACCGAAGTGGTGGTACCTTTATTCCCGA<br/> AAAACTTTACAGACGTCCAAGGAGATACCCATGAGGGAGGAGG<br/> AAGCGAGCAGAACTCATCTCTGAAGAGGATCTGTAA</p> |
| NarX-RssA            | <p>ATGATCGGCTTCAAAGCTTCTTTATGCGCACCATATCTTTAGGT<br/> TCTGGCAATTCTGCTGCTGTGGGGTCTGCTGGTTGCATGGGTGAAA<br/> TATTGGTATTATCCGGACATGGAAAAATACTTTGATAACCAGCAGCG<br/> TATTGTTGCAGCAGGTATTGCAAATATTCTGGATGAAACCGGCACC</p>                                                                                                                                                                                                                                                                                                                                                                                                                                                                                                                                                                                                                                                                                                                                                                                                                                                                                                                                                                                                                                                                                                                                                                                                                                                                                                                                                                                                                                                                                                                                                                                                                                           |

|                                                                                                                                                                                                                                                                                                                                                                                                                                                                                                                                                                                                                                                                                                                                                                                                                                                                                                                                                                                                                                                                                                                                                                                                                                                                                                                                                                                                                                                                                                                                                                                                                                                                                                                                                                                                                                                                                          |
|------------------------------------------------------------------------------------------------------------------------------------------------------------------------------------------------------------------------------------------------------------------------------------------------------------------------------------------------------------------------------------------------------------------------------------------------------------------------------------------------------------------------------------------------------------------------------------------------------------------------------------------------------------------------------------------------------------------------------------------------------------------------------------------------------------------------------------------------------------------------------------------------------------------------------------------------------------------------------------------------------------------------------------------------------------------------------------------------------------------------------------------------------------------------------------------------------------------------------------------------------------------------------------------------------------------------------------------------------------------------------------------------------------------------------------------------------------------------------------------------------------------------------------------------------------------------------------------------------------------------------------------------------------------------------------------------------------------------------------------------------------------------------------------------------------------------------------------------------------------------------------------|
| GACAATATTGATTATCGCGGTATTATCAAACCATCGAGGGCATGTA<br>TATCGACAGCATTAAATAACGGTATGCAGGATGAGATCGATTATCATC<br>CGCTGTTTGTGTATGATCGTGATAATCGTGTGCTGTATAGCAGT<br>CAGACCCAGGGTGAACCGCTGCGTCTGCCTCCGAGCGTTCTGAGC<br>GGTAGCGTTAATTATGCCGGTGCAAATTGGCATCTGGCAGGTAGCT<br>GGAAAGAAAACGTCAGTATCGTGTTATTGTGGCGAAAGCTTTAA<br>TGATCGTACCACACTGTTTGGTAATCCGGCAGATGTTCCGCTGCTG<br>GGTATTCTGGCAGCAATTATTGTTACCCTGCTGTTTACCGCATATTT<br>CAGCCTGCGTCCGCTGCGCCAGATTGCACGTACCATTAGCGATCG<br>TCAGCCTGGTAATCTGAGCCCGATTAATGTTAGCGAACAGTATCAA<br>GAAATTCGTCCGGTTGTTATGGAAGTGAACAAAATGTCTGCAGAAC<br>TGGCCGAAAGTTATGCCGTACTTGAGCAGCGGGTTCAGGAGAAAA<br>CCGCCGGGCTGGAGCATAAAAAATCAGATCCTCTCTTTTTTATGGCA<br>GGCTAACCGCCGTTTGCATTCCCGCGCCCCGCTGTGTGAACGCCT<br>GTCACCTGTAICTAACGGCTTACAGAATTTAACCCCTGCTACGTGAT<br>ATCGAATTGCGGGTGTATGACACTGATGATGAAGAGAATCATCAGG<br>AGTTTACCTGCCAGCCAGATATGACTTGTGATGATAAAGGCTGCCA<br>GCTCTGCCCGCGCGCGTATTACCCGTTGGTGATCGCGGCACGAC<br>CCTGAAGTGGCGGCTGGCTGACTCTCATAACGACGATACGGTATTTG<br>CTGGCGACCCTGCCACAGGGGCGTCATCTTAGCCATGATCAACAA<br>CAACTGGTGGATACCCTGGCTGAACAACCTACCCGCCACGCTGGCG<br>CTGGATCGCCATCAGGAACGTCAGCAACAGTTGATCGTGATGGAA<br>GAGCGTGCCACCATTGCGCGCGAACTGCATGATTCTATTGCCCAAT<br>CTCTCTTGCATGAAGATGCAGGTGAGTTGTTTACAGATGCAGGG<br>CGATGCGCTGCCAGAAAGCAGCCGCGAACTGTTAAGTCAGATCCG<br>TAACGAACTGAATGCATCCTGGGCGCAGTTGCGTGAATTGCTCATC<br>ACATTCCGCTTGCAGCTCACCGAGCCTGGATTACGTCCGGCGCTG<br>GAGGCGAGTTGCGAAGAGTACAGCGCCAAATTTGGCTTCCCGGTG<br>AAGCTGGATTATCAATTGCCGCCTCGCCTGGTGCCTTCGCATCAGG<br>CAATCCACTTGTTGCAAATTGCCCGTGAGGCATTAAGTAACGCCCT<br>CAAACATTCGCAAGCGAGTGAAGTCGTGGTGACGGTGGCGCAAAA<br>CGATAATCAGGTCAAACCTGACCGTCCAGGATAACGGCTGCGGCGT<br>GCCTGAAAATGCCATCCGCAGCAATCACTACGGCATGATAATAATG<br>CGCGATCGTGCGCAAAGTTTACGAGGCGATTGCCGCGTCCGCCGT<br>CGTGAATCAGGTGGCACCGAAGTGGTGGTACCTTTATCCCGAAA<br>AACTTTACAGACGTCCAAGGAGATACCCATGAGGGAGGAGGAA<br>GCGAGCAGAACTCATCTCTGAAGAGGATCTGTAA |
|------------------------------------------------------------------------------------------------------------------------------------------------------------------------------------------------------------------------------------------------------------------------------------------------------------------------------------------------------------------------------------------------------------------------------------------------------------------------------------------------------------------------------------------------------------------------------------------------------------------------------------------------------------------------------------------------------------------------------------------------------------------------------------------------------------------------------------------------------------------------------------------------------------------------------------------------------------------------------------------------------------------------------------------------------------------------------------------------------------------------------------------------------------------------------------------------------------------------------------------------------------------------------------------------------------------------------------------------------------------------------------------------------------------------------------------------------------------------------------------------------------------------------------------------------------------------------------------------------------------------------------------------------------------------------------------------------------------------------------------------------------------------------------------------------------------------------------------------------------------------------------------|

**SI References:**

1. G. Shahane, W. Ding, M. Palaiokostas, M. Orsi, Physical properties of model biological lipid bilayers: insights from all-atom molecular dynamics simulations. *J Mol Model* **25**, 1–13 (2019).
2. S. A. Pandit, S. W. Chiu, E. Jakobsson, A. Grama, H. L. Scott, Cholesterol Packing around Lipids with Saturated and Unsaturated Chains: A Simulation Study. *Langmuir* **24**, 6858 (2008).
3. J. B. Larsen, *et al.*, Membrane Curvature and Lipid Composition Synergize To Regulate N-Ras Anchor Recruitment. *Biophysj* **113**, 1269–1279 (2017).
4. F. Reiss-Husson, Structure des phases liquide-cristallines de différents phospholipides, monoglycérides, sphingolipides, anhydres ou en présence d'eau. *J Mol Biol* **25**, 363–382 (1967).
5. K. Pluhackova, A. Horner, Native-like membrane models of E. coli polar lipid extract shed light on the importance of lipid composition complexity. *BMC Biology* 2021 19:1 **19**, 1–22 (2021).
6. R. M. Venable, F. L. H. Brown, R. W. Pastor, Mechanical properties of lipid bilayers from molecular dynamics simulation. *Chem Phys Lipids* **192**, 60 (2015).
7. Phase Transition Temperatures for Glycerophospholipids | Avanti Polar Lipids (October 29, 2022).
